# Supplementary material
Source: Springer Nature journal article supplement (https://www.springermedizin.de/resource/supplementary/12872_2011_365_MOESM5_ESM.pdf/9429782)
Supplement: MOESM5 [file 9429782]

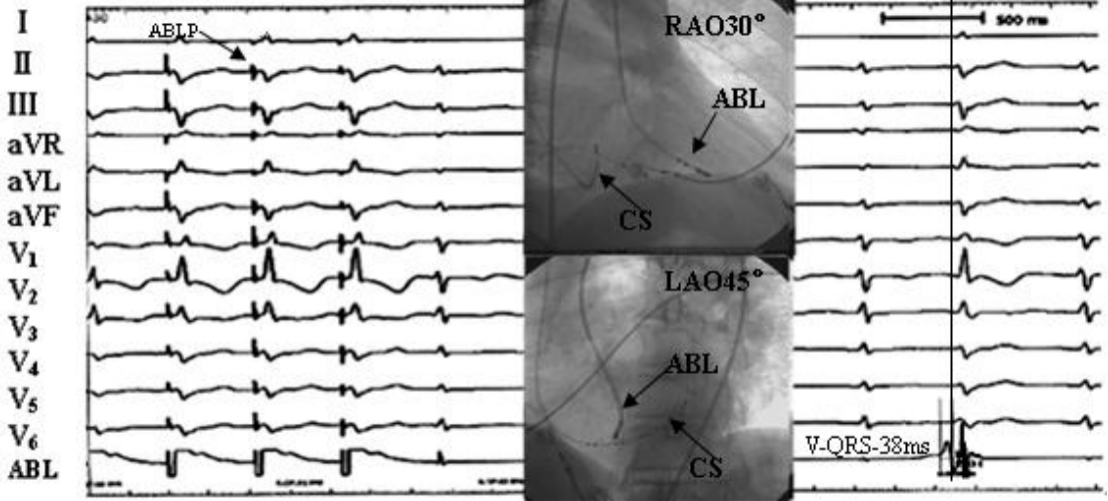

I  
II  
III  
aVR  
aVL  
aVF  
V<sub>1</sub>  
V<sub>2</sub>  
V<sub>3</sub>  
V<sub>4</sub>  
V<sub>5</sub>  
V<sub>6</sub>  
ABL

ABLP

RAO30°

ABL

CS

LAO45°

ABL

CS

500 mm

V-QRS-38ms
